# Supplementary material for: Silencing of the lncRNA Zeb2-NAT facilitates reprogramming of aged fibroblasts and safeguards stem cell pluripotency
Source: PubMed Central journal article supplement (PMC5758807; doi:10.1038/s41467-017-01921-6), 2018-01-08
Supplement: 41467_2017_1921_MOESM1_ESM.pdf [file 41467_2017_1921_MOESM1_ESM.pdf]

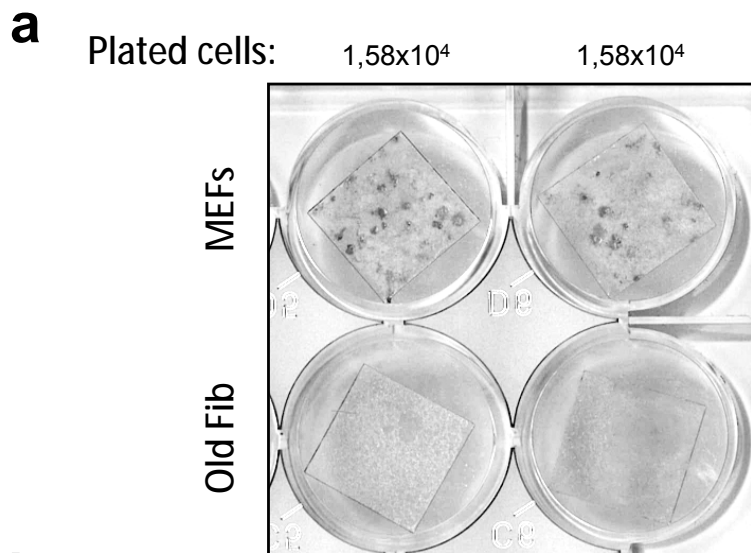

**b**

| Quantification of Reprogramming Efficiency |              |            |                |
|--------------------------------------------|--------------|------------|----------------|
| Experiment                                 | Cells Plated | Colonies   | Efficiency (%) |
| MEFs                                       | 15800        | $14 \pm 2$ | 0.09           |
| Old Fib                                    | 15800        | 0          | 0              |

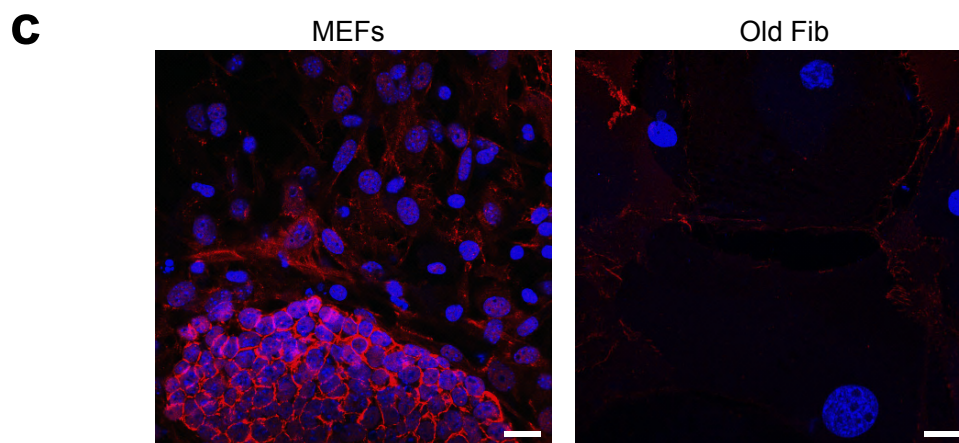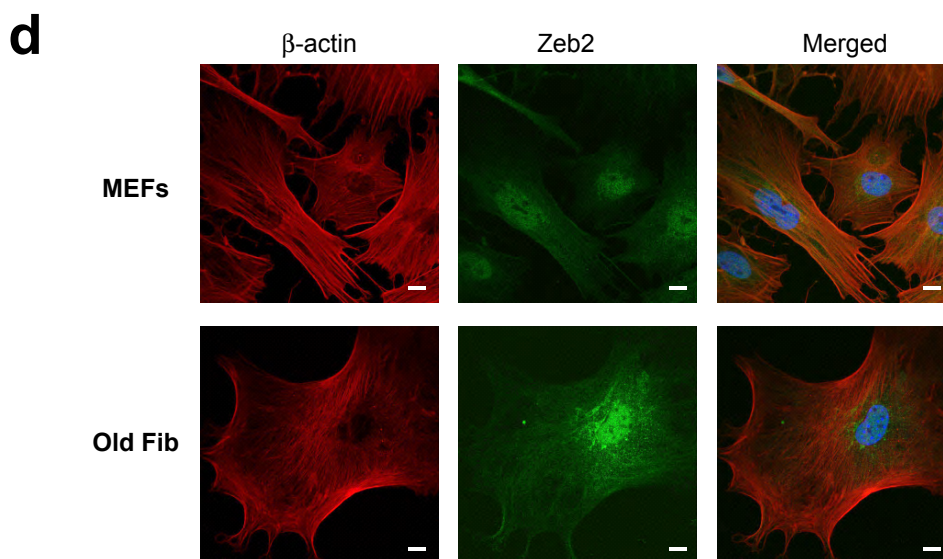

**Supplementary Figure 1. Inefficient reprogramming of old fibroblasts.** **a**, The same number of early passage (P1) mouse embryonic fibroblasts (MEFs) and fibroblasts isolated from old (70-100 week-old) i4F mice were cultured in multiwell plates ( $1.58 \times 10^4$  cells per well) and induced with doxycycline. After 2 weeks of reprogramming, colonies were stained for alkaline phosphatase activity and counted. **b**, quantification of AP<sup>+</sup> colonies. **c**, Immunofluorescence for  $\beta$ -catenin at day 12 after induction with doxycycline. A combined view with DAPI (4,6-diamidino-2-phenylindole) staining is shown (scale bars, 20  $\mu$ m). **d**, Immunofluorescence for  $\beta$ -actin and Zeb2 in P1 cultures of MEFs and old fibroblasts. A combined view with DAPI is shown (scale bars, 10  $\mu$ m).

**a**

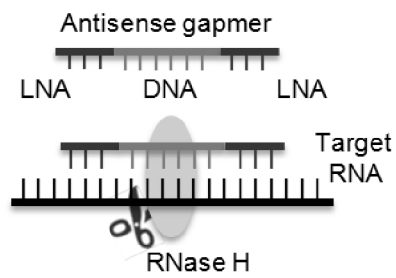

**b**

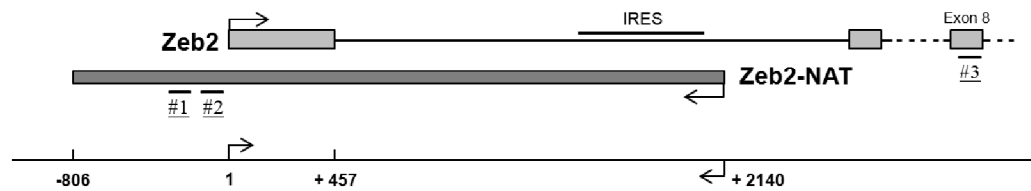

**#1** 5' - ACTCTGCAGGATTTA - 3'

**#2** 5' - TTAGTGATGAGGATA - 3'

**#3** 5' - GTTAGCCTGAGAGGAG - 3'

**Supplementary Figure 2. Antisense oligonucleotides targeting Zeb2 and Zeb2-NAT.** **a**, Schematics of the gapmers used in this study. **b**, The sequences and hybridization sites of LNA gapmers targeting Zeb2-NAT (#1, 2) and Zeb2 (#3) are indicated.

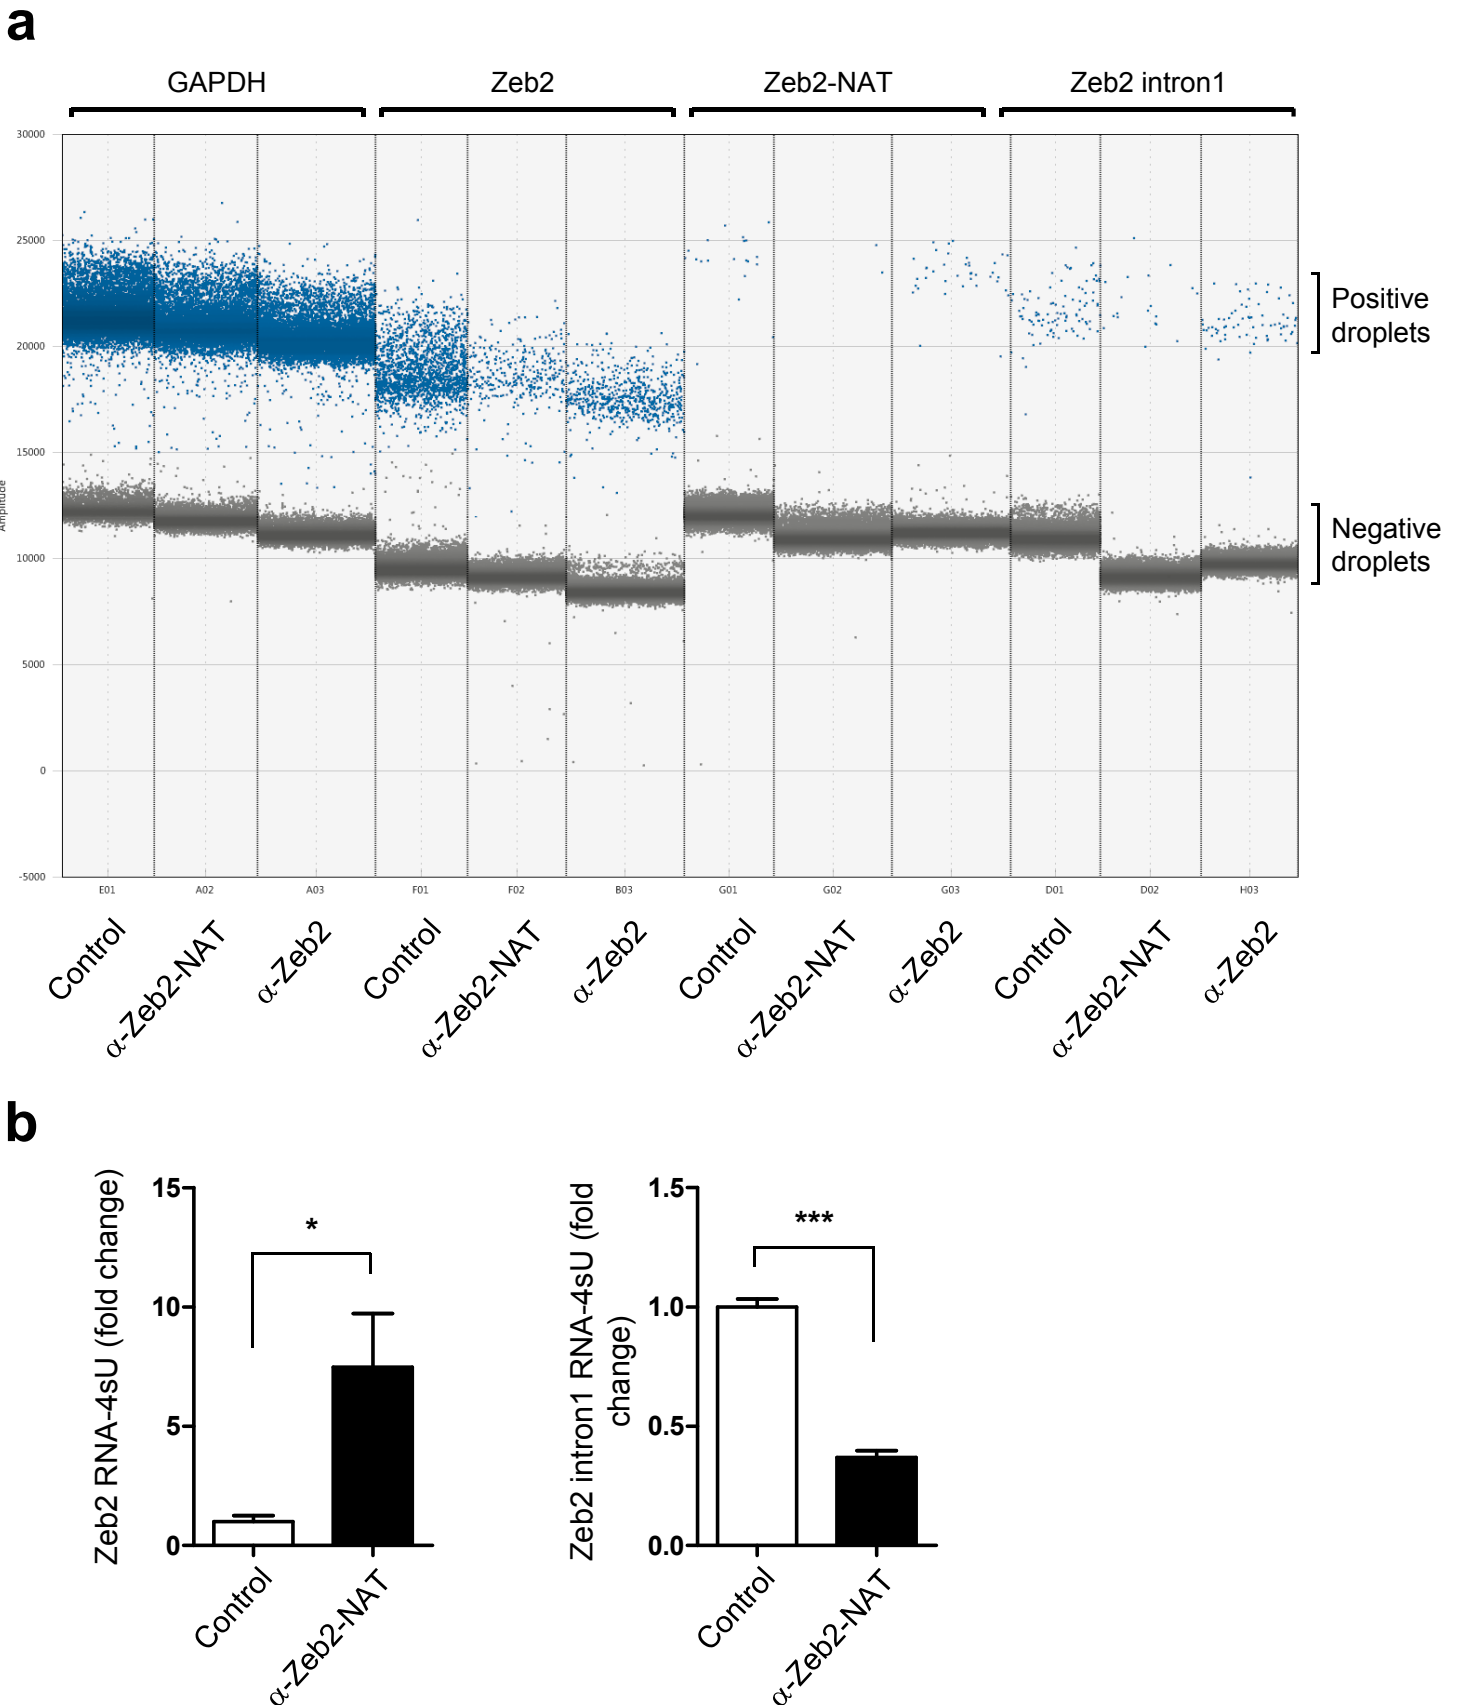

**Supplementary Figure 3. Knocking down Zeb2-NAT affects Zeb2 splicing and transcription.** Fibroblasts from old mice were transfected with either control LNA gapmers or oligonucleotides targeting Zeb2-NAT and Zeb2. **a**, droplet-digital-PCR analysis. **b**, After a labeling time of 30 minutes, newly-transcribed RNA-4sU was analyzed by qRT-PCR using primers Zeb2 #1 and Zeb2 intron for detection of total Zeb2 transcripts and transcripts with retention in the first intron, respectively. Student's t-test (two-tailed) statistics, \*  $p < 0,05$ ; \*\*\*  $p < 0,001$ ; error bars represent standard deviation; 3 independent experiments were carried per condition.

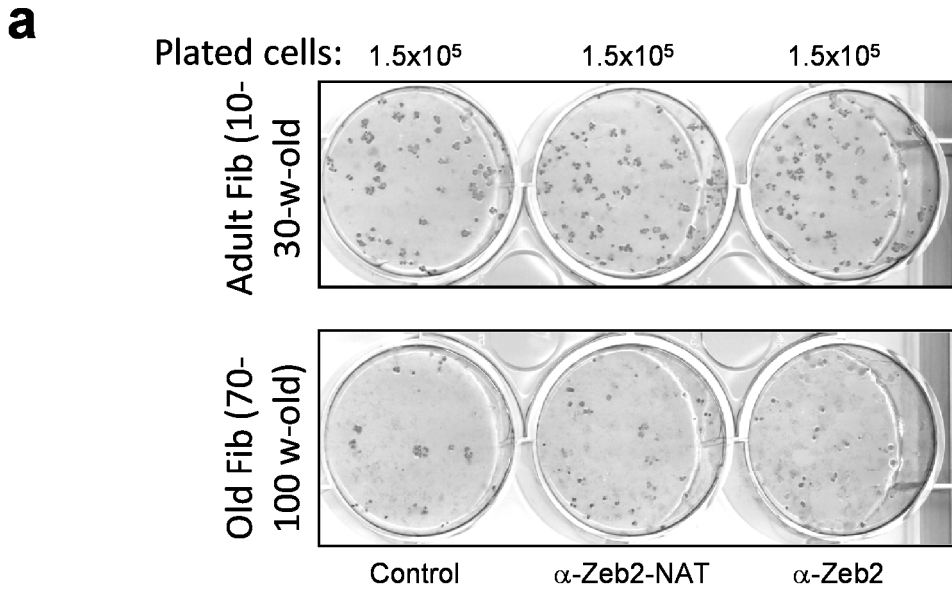

**b**

| Quantification of Reprogramming Efficiency |              |          |                |
|--------------------------------------------|--------------|----------|----------------|
| Experiment                                 | Cells Plated | Colonies | Efficiency (%) |
| Adult Fib                                  | 150000       | 37 ± 5   | 0.025          |
| Adult Fib + $\alpha$ -Zeb2-NAT             | 150000       | 59 ± 2   | 0.04           |
| Adult Fib + $\alpha$ -Zeb2                 | 150000       | 48 ± 2   | 0.03           |
| Old Fib                                    | 150000       | 5 ± 5    | 0.003          |
| Old Fib + $\alpha$ -Zeb2-NAT               | 150000       | 17 ± 11  | 0.01           |
| Old Fib + $\alpha$ -Zeb2                   | 150000       | 15 ± 10  | 0.01           |

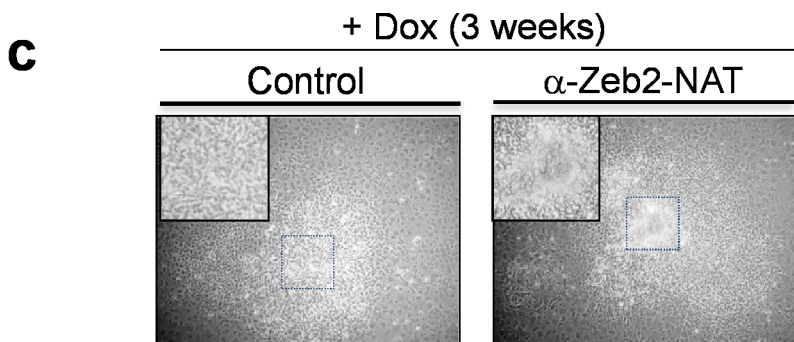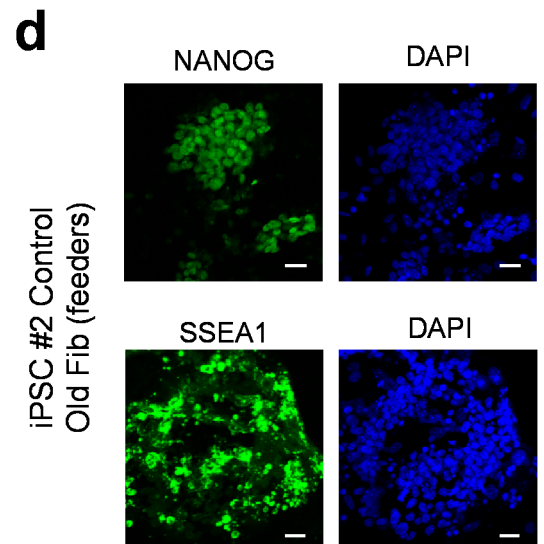

**Supplementary Figure 4. Knocking down Zeb2-NAT enhances reprogramming of old fibroblasts.**

Fibroblasts from adult and old mice were transfected with either control LNA gampers or oligonucleotides targeting Zeb2-NAT and Zeb2, and 24 hours later doxycycline was added to the culture to induce reprogramming. **a**, Representative culture plates incubated in the presence of doxycycline for 3 weeks and stained for Alkaline Phosphatase. **b**, quantification of AP<sup>+</sup> colonies. **c**, Morphology of reprogramming fibroblasts from old mice transfected with the indicated oligonucleotides after 3 weeks of doxycycline induction before culture in feeder-free medium. **d**, Immunofluorescence for Nanog and SSEA1 in representative colonies reprogrammed from untreated old fibroblasts initially cultured in the presence of feeder cells and passed 5 times in feeder-free medium before immunofluorescence; the corresponding images stained with DAPI are shown (scale bars, 20 mm).

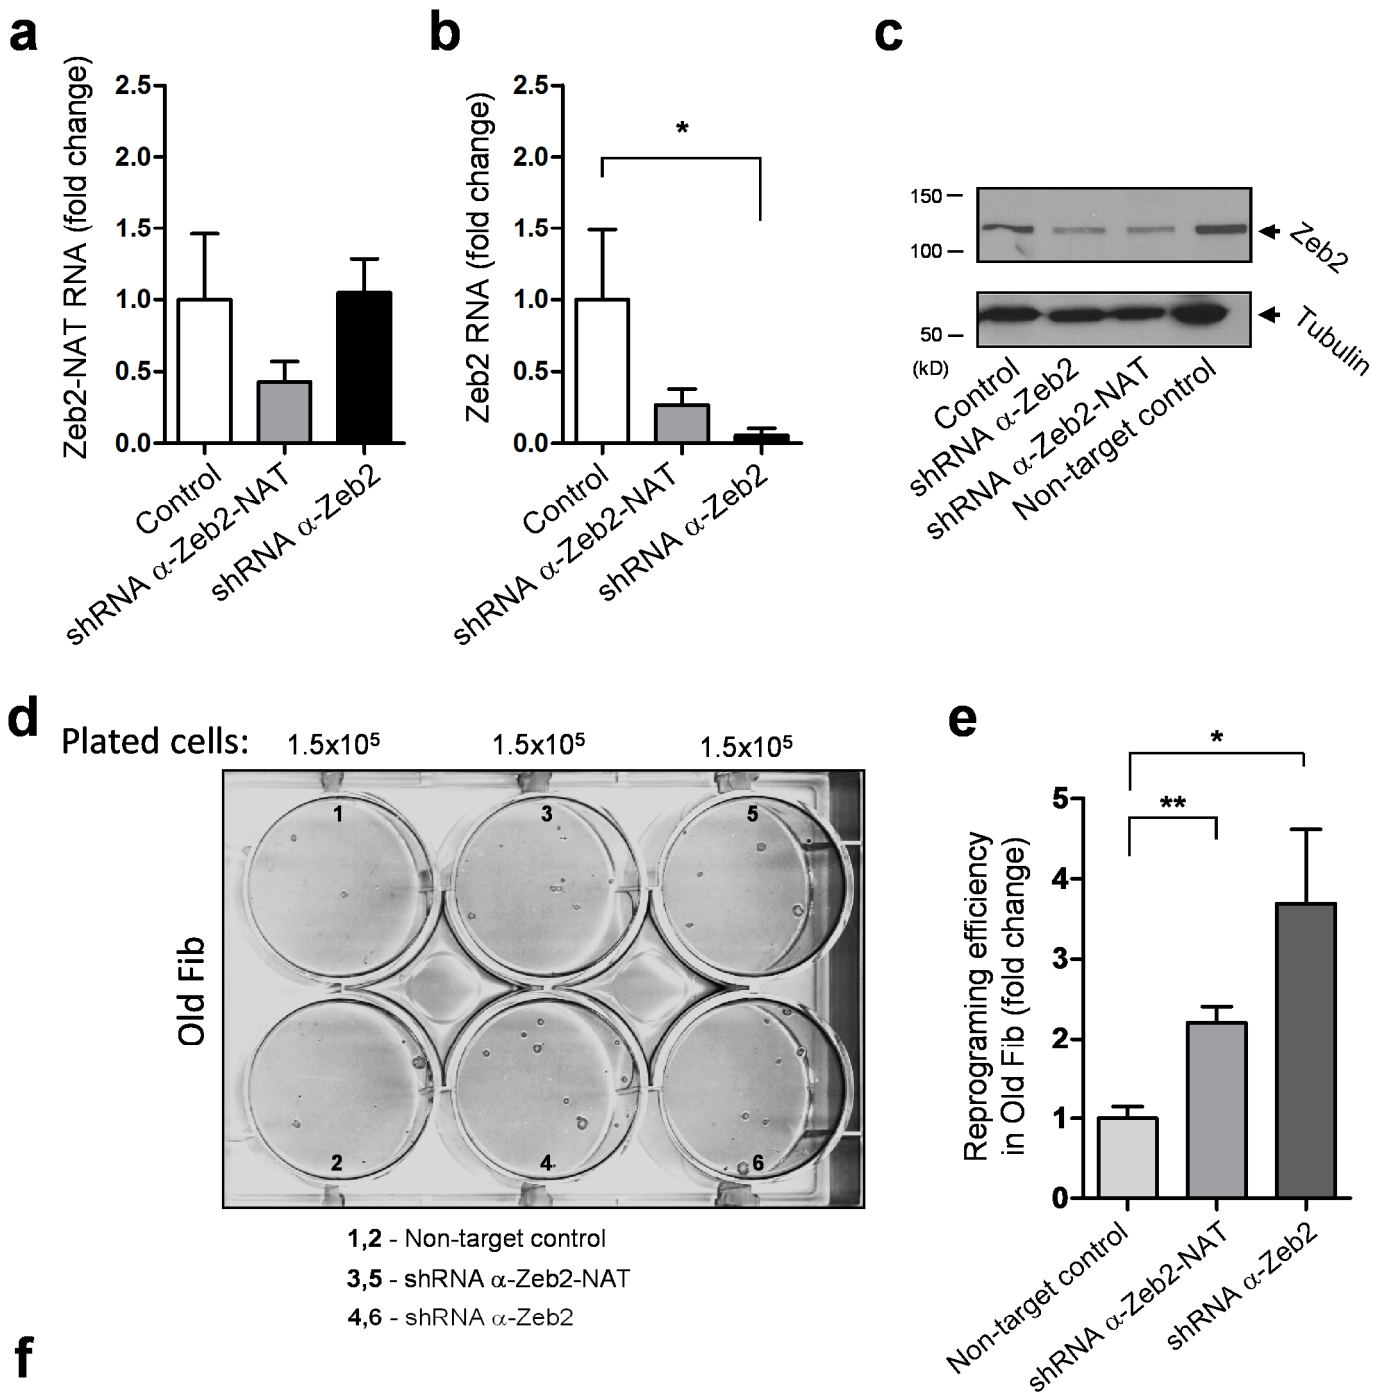

**f**

#### Quantification of Reprogramming Efficiency

| Experiment                   | Cells Plated | Colonies | Efficiency (%) |
|------------------------------|--------------|----------|----------------|
| Old Fib + non-target control | 150000       | 2 ± 1    | 0.0013         |
| Old Fib + shRNA α-Zeb2-NAT   | 150000       | 5 ± 1    | 0.003          |
| Old Fib + shRNA α-Zeb2       | 150000       | 8 ± 1    | 0.005          |

**Supplementary Figure 5. Knockdown of Zeb2 and Zeb2-NAT expression using shRNAs.** Fibroblasts from old mice were either non treated or infected with lentival particles containing a DNA sequence that codes for a shRNA targeting Zeb2-NAT, a shRNA targeting Zeb2, and a non-targeted control shRNA (sequences in Supplementary Table 1). **a,b**, qRT-PCR analysis of Zeb2-NAT and total Zeb2 RNA (primer Zeb2 #1, see Supplementary Table 2). Transcript levels were normalized to GAPDH mRNA and depicted as fold change relative the control condition. **c**, Immunoblot for Zeb2 and tubulin in total cell lysates. **d**, Representative reprogramming experiment stained for Alkaline Phosphatase after 3 weeks with doxycycline. **e**, Reprogramming efficiency estimated from the number of AP<sup>+</sup> colonies observed after 3 weeks in culture in the presence of doxycycline. **f**, Quantification of AP<sup>+</sup> colonies. For all graphics depicted, Student's t-test (two-tailed) statistics, \*  $p < 0,05$ , \*\*  $p < 0,01$ ; error bars represent standard deviation; at least 3 independent experiments were carried per condition.

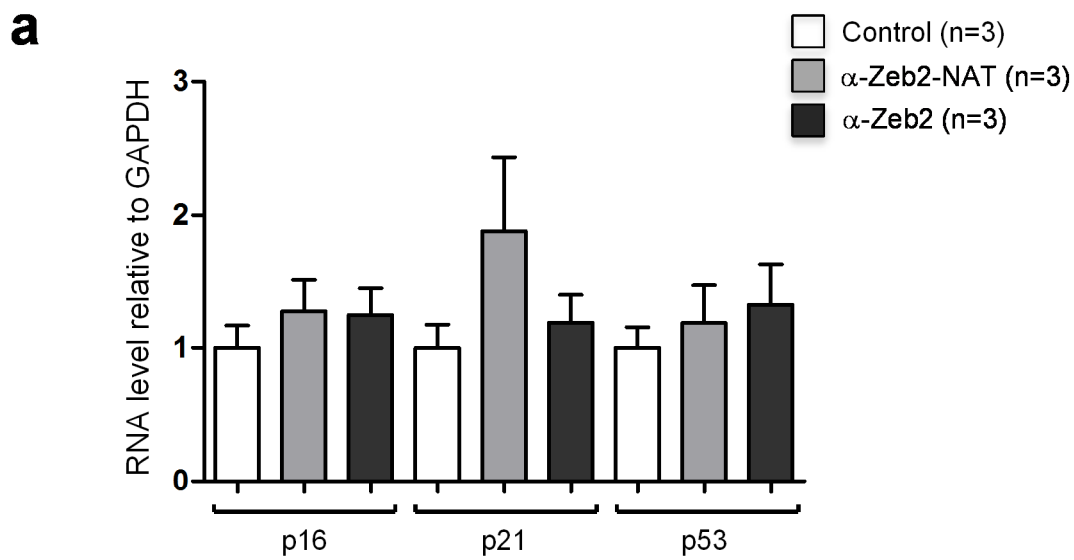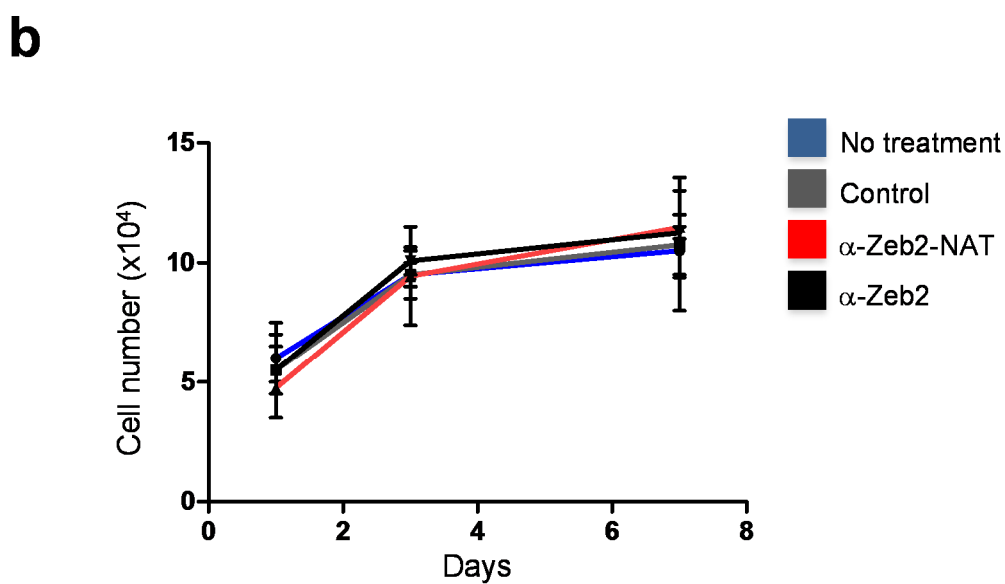

**Supplementary Figure 6. Knockdown of Zeb2 and Zeb2-NAT does not affect cell proliferation.** Fibroblasts from old mice were transfected with the indicated oligonucleotides. **a**, qRT-PCR analysis of p16, p21 and p53 mRNA. **b**, Cell number at the indicated days after transfection.

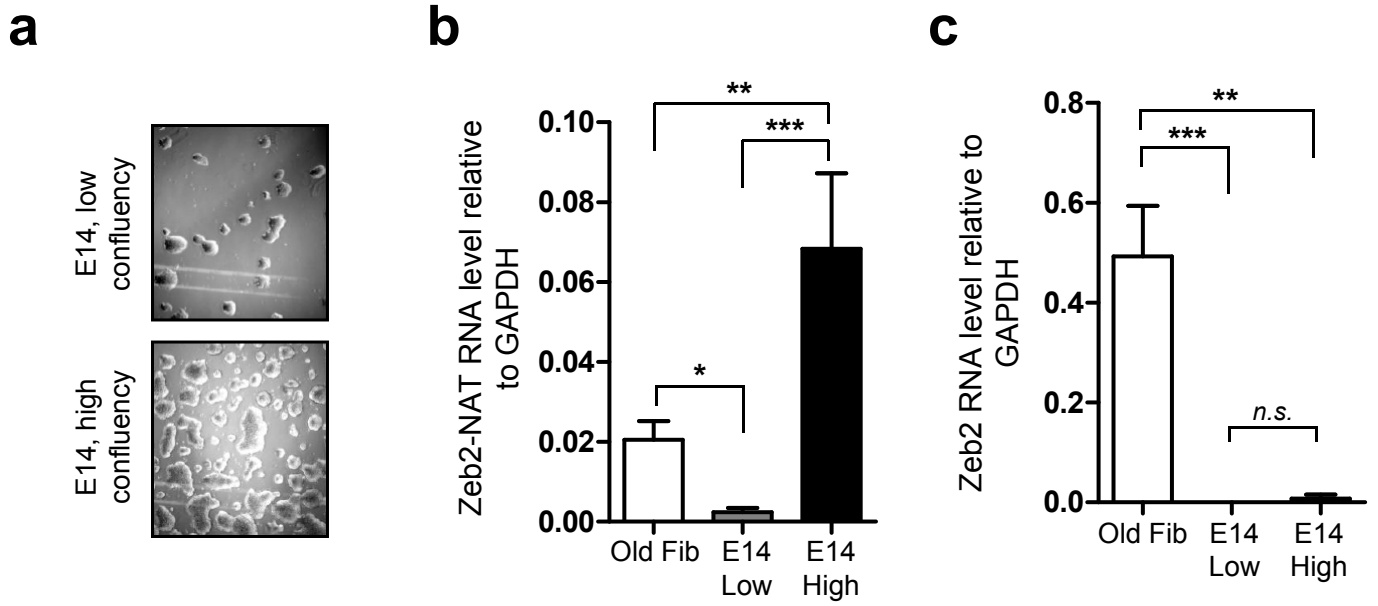

**Supplementary Figure 7. Zeb2-NAT expression in ES cells changes rapidly in response to differentiation stimuli.** **a**, Representative images of E14 cells grown at low or high confluency. **b**, **c**, qRT-PCR analysis of Zeb2-NAT and total Zeb2 RNA in old fibroblasts and E14 cells grown at low or high confluency. Student's t-test (two-tailed) statistics, \*  $p < 0,05$ , \*\*  $p < 0,01$ , \*\*\*  $p < 0,001$ ; error bars represent standard deviation; at least 3 independent experiments were carried per condition.

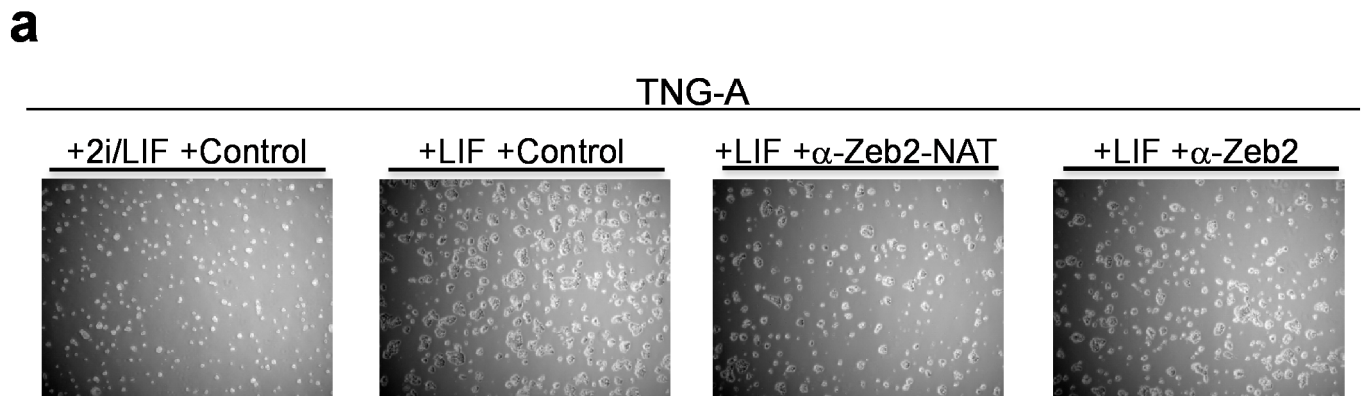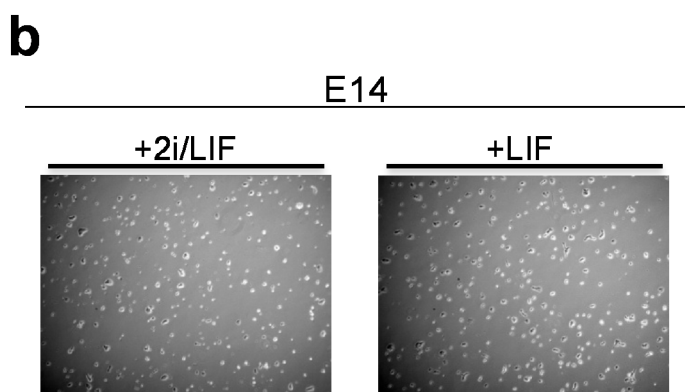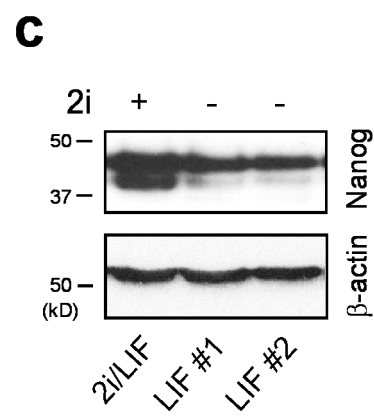

**d**

| Tumor Volume | ECTODERM                       |                     |                                  |                             |                           |                               | ENDODERM                |              |                    | MESODERM |           |         |         |
|--------------|--------------------------------|---------------------|----------------------------------|-----------------------------|---------------------------|-------------------------------|-------------------------|--------------|--------------------|----------|-----------|---------|---------|
|              | <i>skin and adnexal glands</i> |                     |                                  | <i>neural tissue</i>        |                           |                               | <i>respiratory-type</i> |              | <i>GI tract</i>    | bone     | cartilage | muscle  | adipose |
| Group        | mm <sup>3</sup>                | squamous epithelium | glandular epithelium (sebaceous) | melanocytes/pigmented cells | primitive neuroepithelium | differentiated nervous tissue | ciliated epithelium     | goblet cells | esophagus to colon |          |           |         |         |
| E14+LIF      | 122,5                          | present             | present                          | absent                      | absent                    | present                       | present                 | present      | absent             | absent   | absent    | present | no      |
| E14+LIF/2i   | 224                            | present             | present                          | absent                      | present                   | present                       | present                 | present      | absent             | present  | present   | present | no      |

**Supplementary Figure 8. Removing 2i from the culture medium challenges ES cells.** **a**, Representative images of TNG-A cells grown in the presence or absence of 2i for 48h; cells were previously transfected with either control LNA gapmers or oligonucleotides targeting Zeb2-NAT and Zeb2. **b**, Representative images of E14 cells grown in the presence or absence of 2i for 48h. **c**, Immunoblot for Nanog and β-actin in total cell lysates from E14 cells grown in the presence or absence of 2i. **d**, Characteristics of teratomas observed at 7 weeks after subcutaneous injection of  $2 \times 10^6$  E14 cells previously grown in the presence or absence of 2i.



**a**

| Group                   | Animal ID | ECTODERM                       |                                          |                           |                               | ENDODERM                |              | MESODERM |           |         |         |
|-------------------------|-----------|--------------------------------|------------------------------------------|---------------------------|-------------------------------|-------------------------|--------------|----------|-----------|---------|---------|
|                         |           | <i>skin and adnexal glands</i> |                                          | <i>neural tissue</i>      |                               | <i>respiratory-type</i> |              | bone     | cartilage | muscle  | adipose |
|                         |           | squamous epithelium            | granular epithelium (sebaceous/apocrine) | primitive neuroepithelium | differentiated nervous tissue | ciliated epithelium     | goblet cells |          |           |         |         |
| TNGA LIF/2i             | 1         | present                        | present                                  | present                   | absent                        | present                 | present      | present  | present   | present | absent  |
|                         | 2         | absent                         | absent                                   | absent                    | absent                        | absent                  | present      | present  | absent    | absent  | absent  |
| TNGA LIF                | 1         | absent                         | absent                                   | absent                    | absent                        | absent                  | absent       | absent   | absent    | absent  | absent  |
|                         | 2         | absent                         | absent                                   | absent                    | absent                        | absent                  | absent       | absent   | absent    | absent  | absent  |
| TNGA LIF $\alpha$ -NAT  | 1         | present                        | present                                  | present                   | present                       | present                 | present      | present  | present   | present | present |
|                         | 2         | present                        | present                                  | absent                    | present                       | absent                  | present      | absent   | absent    | present | present |
| TNGA LIF $\alpha$ -Zeb2 | 1         | present                        | present                                  | absent                    | absent                        | absent                  | present      | absent   | present   | absent  | present |
|                         | 2         | absent                         | absent                                   | absent                    | absent                        | present                 | absent       | present  | absent    | absent  | absent  |

**b**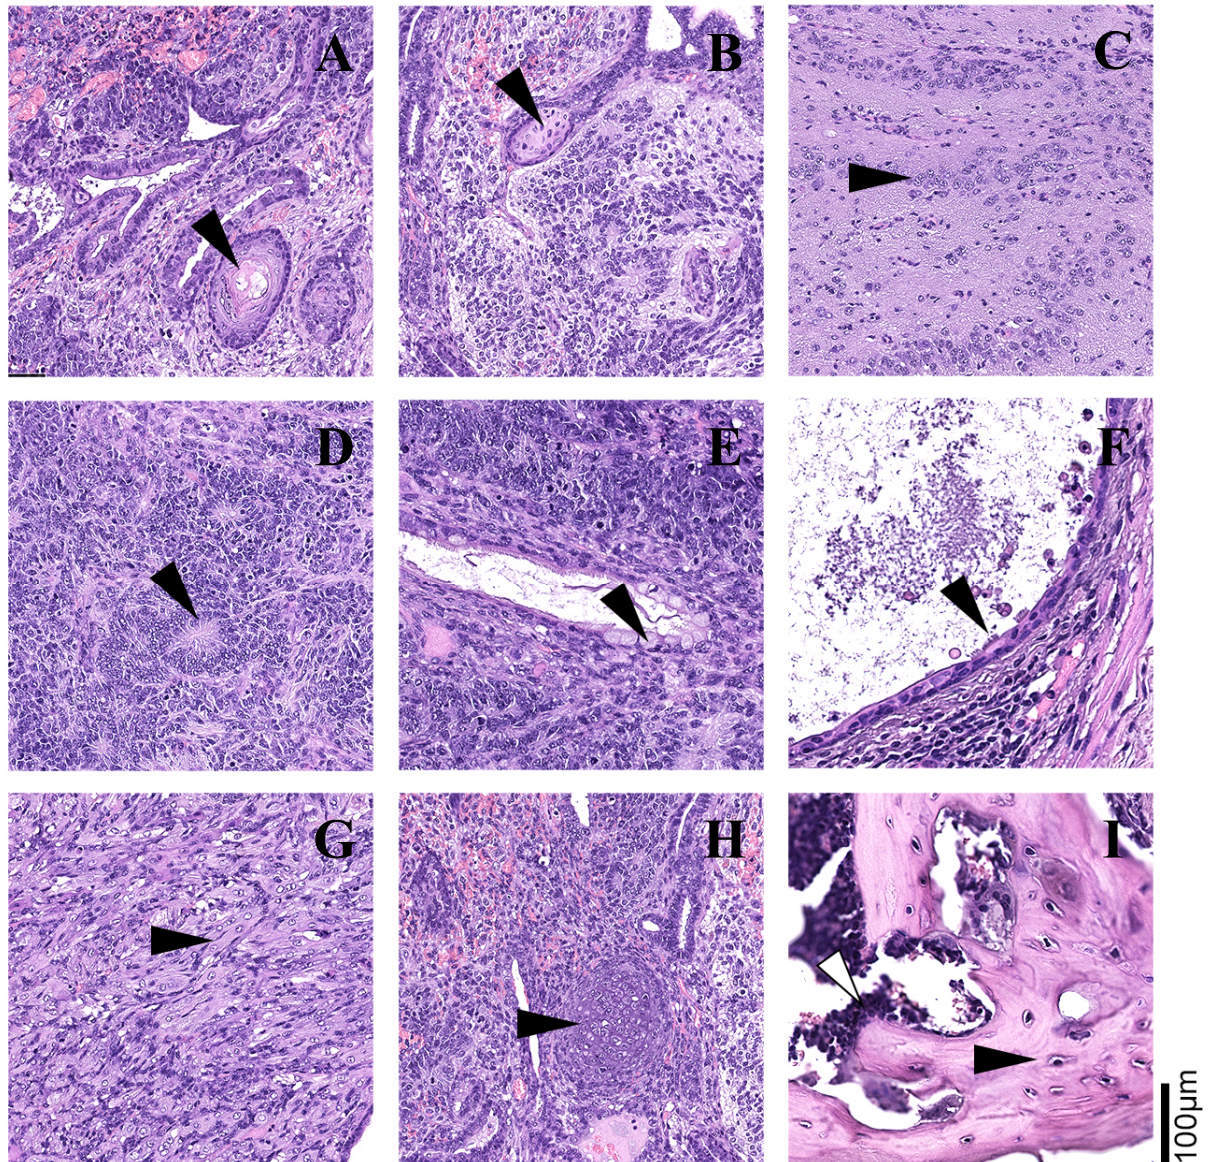

### Supplementary Figure 9. Blocking Zeb2-NAT expression in TNG-A cells affects teratoma formation.

TNG-A cells were either nontransfected or transfected with oligonucleotides targeting Zeb2 and Zeb2NAT, and then grown in the presence or absence of 2i. **a**, Characteristics of teratomas observed at 7 weeks after subcutaneous injection of  $2 \times 10^6$  cells. **b**, Histological sections of teratomas stained with hematoxylin and eosin. Ectodermal components corresponding to skin and adnexa, including squamous (black arrow, A) and sebaceous epithelium (black arrow, B); differentiated nervous cells (black arrow, C) and primitive neuroepithelium, arranged in rosettes (black arrow, D). Endodermal components corresponding to respiratory-type epithelium, including ciliated (black arrow, E), and mucin-producing goblet cells (black arrow, F). Mesodermal components corresponding to muscle (black arrow, G), cartilage (black arrow, H) and bone and hematopoietic tissue (black and white arrow, respectively, I).

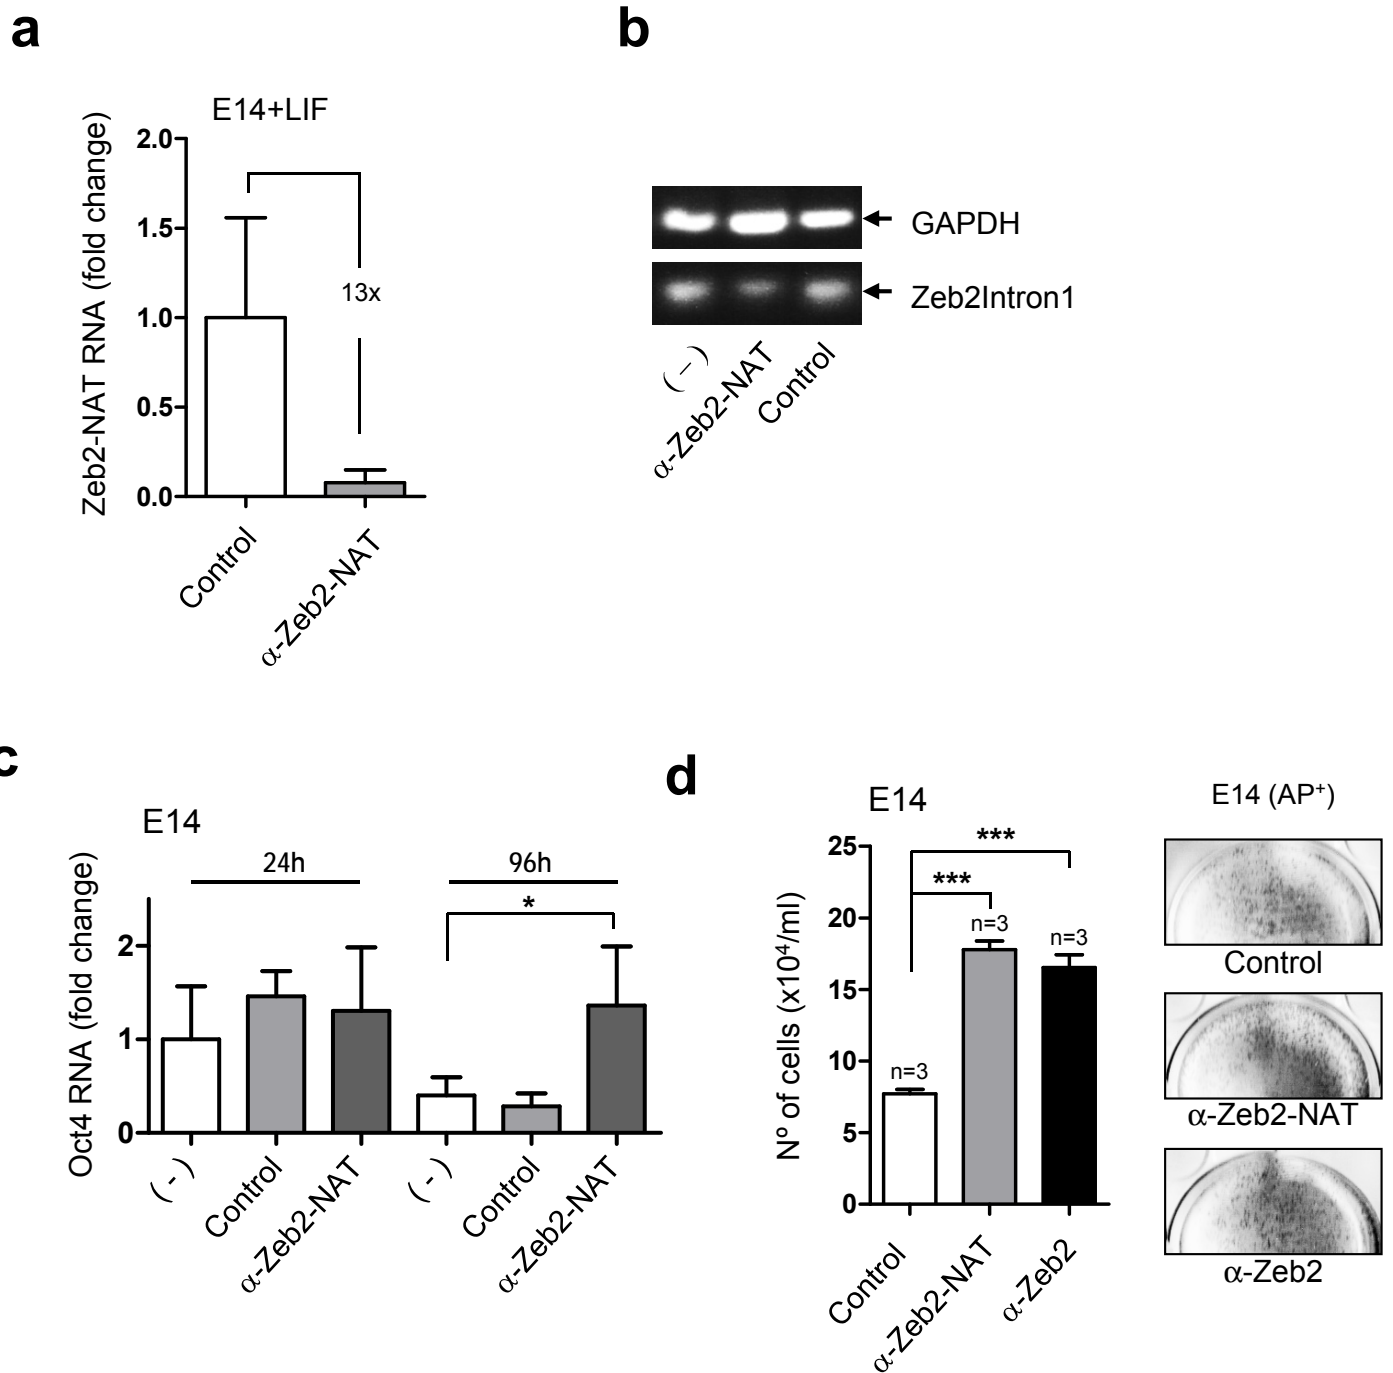

**Supplementary Figure 10. Downregulation of Zeb2-NAT expression in stem cells.** **a**, qRT-PCR analysis of Zeb2-NAT transcripts in E14 cells that were transfected with either control LNA gampers or oligonucleotides targeting Zeb2-NAT. **b**, Semi-quantitative RT-PCR analysis of GAPDH and Zeb2 transcripts with retention of the first intron in E14 cells that were either mock transfected (-) or transfected with anti-Zeb2-NAT and control LNA gampers. **c**, qRT-PCR analysis of Sox2 and Oct4 transcripts in E14 cells that were transfected as indicated and maintained for 24h and 96h in feeder-free conditions without 2i. Transcript levels were normalized to GAPDH mRNA and depicted as fold change. **d**, Quantification of AP<sup>+</sup> clones: the same number of E14 cells transfected with either control LNA gampers or oligonucleotides targeting Zeb2-NAT or Zeb2 were maintained for 4 days in feeder-free conditions without 2i; cells were then stained for alkaline phosphatase (AP) activity.

**Fig 1g**

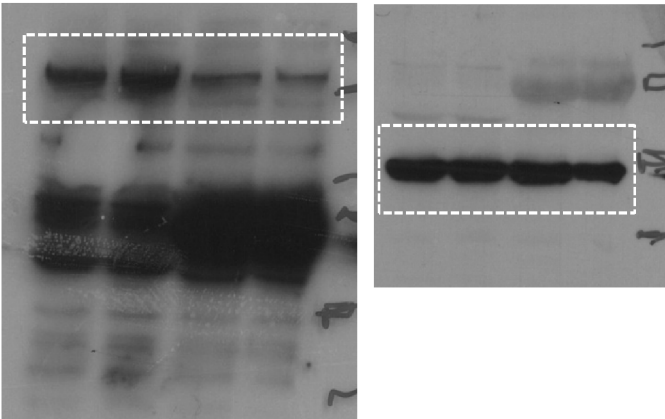

**Fig 3c**

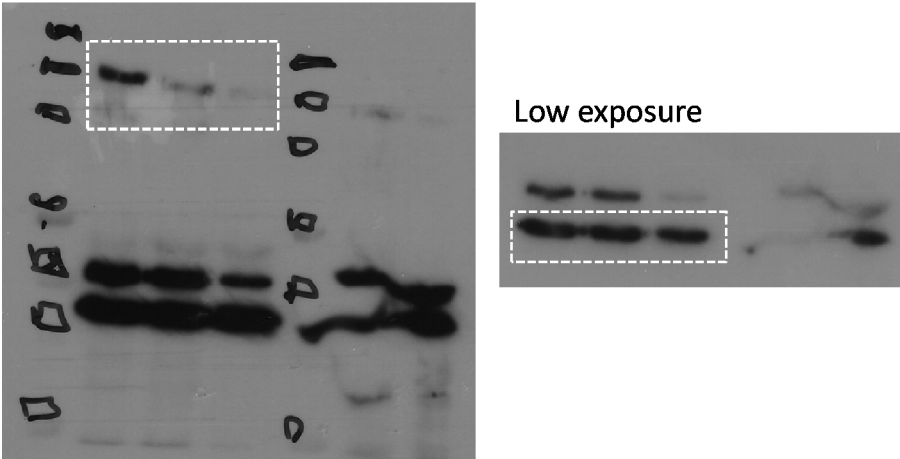

**Fig 5d**

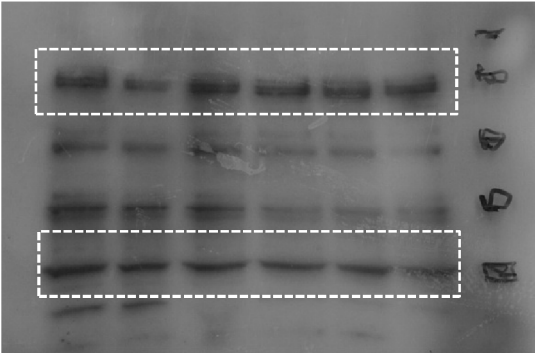

**Fig 6b**

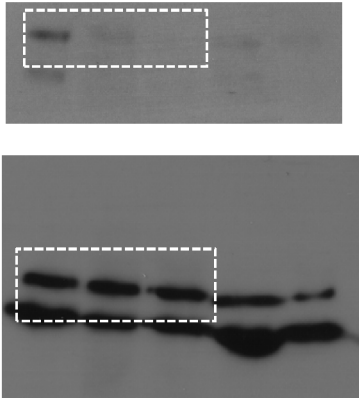

Fig 7d & S8c

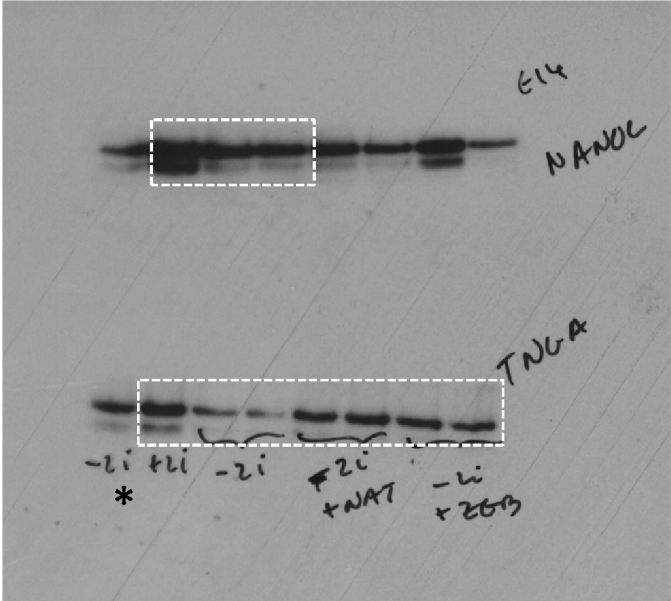

\* - 24h -2i condition

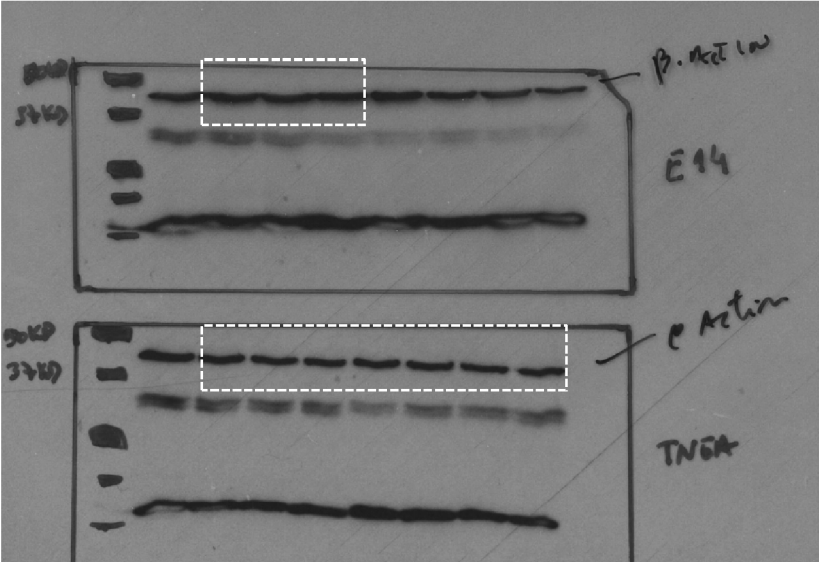

Fig S5c

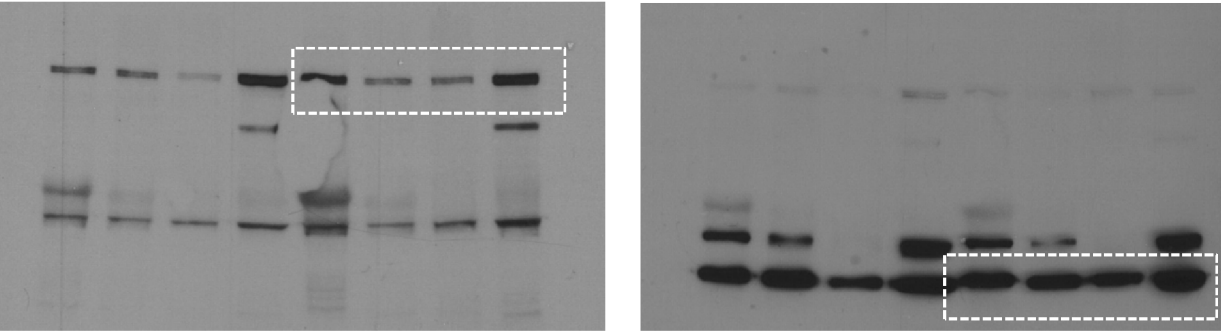

Supplementary Figure 11. Uncropped western blots.

**Supplementary Table 1. Sequences.**

**LNA Gappers**

| Target RNA | Sequence                                |
|------------|-----------------------------------------|
| Zeb2       | <b>5' – CACGTTAGCCTGAGAGGAGGTT-3'</b> * |
| Zeb2-NAT   | <b>5' – CACACTCTGCAGGATTTAGTT-3'</b> *  |
| Zeb2-NAT   | <b>5' – CACTTAGTGATGAGGATAGTT-3'</b> *  |

\* The center (gap) of the antisense oligonucleotides consist of deoxynucleotide bases and phosphorothioate backbone linkages. The flanking LNA-modified bases are depicted in bold.

**2'OMe RNAs**

| Target RNA   | Sequence                                                                                                           |
|--------------|--------------------------------------------------------------------------------------------------------------------|
| mZeb2-NAT #1 | <b>5' –</b><br>[mG][mC][mU][mU][mU][mG][mC][mG][mG][mA][mA][mA]<br>[mA][mC][mC][mU][mG][mG][mA][mA][mA] <b>-3'</b> |
| mZeb2-NAT #2 | <b>5' –</b><br>[mA][mA][mA][mG][mG][mU][mG][mG][mA][mG][mG][mC]<br>[mG][mA][mA][mG][mA][mA][mA][mC] <b>-3'</b>     |

**shRNAs**

| Target RNA | Sequence                     | Particle titer                  |
|------------|------------------------------|---------------------------------|
| mZeb2      | <b>CCCATTTAGTGCCAAGCCTTT</b> | <b>8.7x10<sup>6</sup> TU/ml</b> |
| mZeb2      | <b>CCACTAGACTTCAATGACTAT</b> | <b>1.3x10<sup>7</sup> TU/ml</b> |
| mZeb2-NAT  | <b>ATGCAGATCTCTTGTCTTATA</b> | <b>9.4x10<sup>6</sup> TU/ml</b> |
| mZeb2-NAT  | <b>AGGGATTGGTTATGCAAATAT</b> | <b>1.2x10<sup>7</sup> TU/ml</b> |
|            | <b>Non-Target Control</b>    | <b>7.9x10<sup>6</sup> TU/ml</b> |

**Supplementary Table 2. Primers used for qRT-PCR**

| <b>Target RNA</b> | <b>Forward primer</b>    | <b>Reverse primer</b>    | <b>Product Size (bp)</b> |
|-------------------|--------------------------|--------------------------|--------------------------|
| Actin             | GGCACCACACCTTCTACAATG    | GTGGTGGTGAAGCTGTAG       | 352                      |
| GAPDH             | TTCACCACCATGGAGAAGGC     | CCCTTTTGGCTCCACCCT       | 52                       |
| Zeb2 #1           | TATGGCCTATACCTACCCAAC    | AGGCCTGACATGTAGTCTTGTG   | 126                      |
| Zeb2-NAT #1       | ACAAAGATAGGTGGCGCGTG     | GCATGAAGAAGCCGCGAAGTGT   | 271                      |
| Zeb2-NAT #2       | CTGGACCCCTCTACACCTCA     | CCAATCCCTTCAGAGCAAAG     | 213                      |
| Zeb2-intron       | CGTGTGCATTCCCTCATACG     | CTGTTTGGTGTGTTGCACTC     | 94                       |
| mOCT4             | TAGGTGAGCCGTCTTTCCACC    | GCTTAGCCAGGTTTCGAGGATC   | 160                      |
| mSOX2             | GCGGAGTGGAAACTTTTGTC     | CGGGAAGCGTGTACTTATCC     | 157                      |
| mNANOG            | AGGGTCTGCTACTGAGATGCTCTG | CAACCACTGGTTTTTCTGCCACCG | 363                      |
| mECad             | AATGGCGGCAATGCAATCCCAAGA | TGCCACAGACCGATTGTGGAGATA | 93                       |
| mp16              | CGTACCCCGATTTCAGGTGAT    | TTGAGCAGAAGAGCTGCTACGT   | 59                       |
| mp21              | GGCCCGGAACATCTCAGG       | AAATCTGTCAGGCTGGTCTGC    | 52                       |
| mp53              | CCCCTGTCATCTTTTGTCCCTT   | GGGAGGAGAGTACGTGCACATAA  | 114                      |
| mZeb2 A           | CCACATTGTCGCTGTGTTTG     | CCCGGCTCACTTCAGACTA      | 150                      |
| mZeb2 B           | GCCATCTGATCCGCTCTTAT     | GGCTTCCTTCTCCCTGTCC      | 179                      |
| mZeb2 C           | TATGTGGGGGCATTGGTAT      | GAGGGTTTGCAAGGCTAT       | 157                      |
| mZeb2 D           | CGACACGGCCATTATTTACC     | ATGAAATTCCATGCCTCTGC     | 208                      |
| mZeb2 E           | ACCTTTTTCTCCCCACACT      | CGGCTGCTTCATTGATAAGA     | 166                      |
| mZeb2 F           | GCCATCTGATCCGCTCTTAT     | GAGGGTTTGCAAGGCTATCA     | 188                      |

**Supplementary Table 3. Antibodies used for immunoblotting and immunofluorescence**

| <b>Target protein</b> | <b>Supplier</b>                          | <b>Dilution Immunoblotting</b> | <b>Dilution Immunofluorescence</b> |
|-----------------------|------------------------------------------|--------------------------------|------------------------------------|
| SSEA-1                | MAB4301 - Millipore                      |                                | 1:250                              |
| Nanog                 | Alexa fluor 488 conjugated - eBioscience | 1:500                          | 1:200                              |
| Zeb2                  | ABE573 - Millipore                       | 1:500                          | 1:200                              |
| beta-Catenin          | 180226 - clone CAT-5H10 - ThermoFisher   |                                | 1:150                              |
